# Supplementary material
Source: publisher figshare collection journal article supplement (https://acs.figshare.com/ndownloader/files/5791293)
Supplement: Supplementary file 1 [file 5791293]

#### Terms & Conditions

Electronic Supporting Information files are available without a subscription to ACS Web Editions. The American Chemical Society holds a copyright ownership interest in any copyrightable Supporting Information. Files available from the ACS website may be downloaded for personal use only. Users are not otherwise permitted to reproduce, republish, redistribute, or sell any Supporting Information from the ACS website, either in whole or in part, in either machine-readable form or any other form without permission from the American Chemical Society. For permission to reproduce, republish and redistribute this material, requesters must process their own requests via the RightsLink permission system. Information about how to use the RightsLink permission system can be found at <http://pubs.acs.org/page/copyright/permissions.html>

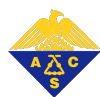

ACS Publications

MOST TRUSTED. MOST CITED. MOST READ.

Copyright © 1996 American Chemical Society

**Table 5.** Reaction of iodobenzene in tri-*n*-butyltin deuteride / tri-*n*-butyltin hydride mixtures at 31 °C. An attempted direct determination of the deuterium kinetic isotope effect.<sup>a</sup>

| Reactants (moles)     |                                                              |                                                              |                                                                              |           |                                              |
|-----------------------|--------------------------------------------------------------|--------------------------------------------------------------|------------------------------------------------------------------------------|-----------|----------------------------------------------|
| 10 <sup>5</sup> x IPh | 10 <sup>4</sup> x <i>n</i> -Bu <sub>3</sub> SnH <sup>b</sup> | 10 <sup>4</sup> x <i>n</i> -Bu <sub>3</sub> SnD <sup>c</sup> | C <sub>6</sub> H <sub>6</sub> / C <sub>6</sub> H <sub>5</sub> D <sup>d</sup> | SnH / SnD | k <sub>H</sub> / k <sub>D</sub> <sup>e</sup> |
| 1.62                  | 3.38                                                         | 2.23                                                         | 1.46                                                                         | 1.52      | 0.964                                        |
| 1.77                  | 2.38                                                         | 2.51                                                         | 0.925                                                                        | 0.948     | 0.976                                        |
| 1.81                  | 1.80                                                         | 3.14                                                         | 0.571                                                                        | 0.573     | 0.997                                        |

<sup>a</sup>Experiments are listed in the order in which they were carried out. Iodobenzene in mixtures of (neat) *n*-Bu<sub>3</sub>SnH and (neat) *n*-Bu<sub>3</sub>SD (ca. 1 : 10 : 10 mole ratio) was photolyzed ( $\lambda > 300$  nm) for 4 min after which the mixtures were analyzed in the usual way for C<sub>6</sub>H<sub>6</sub> and C<sub>6</sub>H<sub>5</sub>D. Corrections were required for the purity of the *n*-Bu<sub>3</sub>SnH (97%) and *n*-Bu<sub>3</sub>SnD (96%) and for the probable 2.8% *n*-Bu<sub>3</sub>SnH impurity in the *n*-Bu<sub>3</sub>SnD:

$$(n\text{-Bu}_3\text{SnH})_{\text{actual}} = 0.97 (n\text{-Bu}_3\text{SnH})_{\text{nominal}} + (0.028 \times 0.96) (n\text{-Bu}_3\text{SnD})_{\text{nominal}}$$

$$(n\text{-Bu}_3\text{SnD})_{\text{actual}} = (0.960 \times 0.972) (n\text{-Bu}_3\text{SnD})_{\text{nominal}}$$

$$\frac{k_H}{k_D} = \frac{(C_6H_6)_{\text{actual}}}{(C_6H_5D)_{\text{actual}}} \cdot \frac{0.933 (n\text{-Bu}_3\text{SnD})_{\text{nominal}}}{0.97 (n\text{-Bu}_3\text{SnH})_{\text{nominal}} + 0.027 (n\text{-Bu}_3\text{SnD})_{\text{nominal}}}$$

<sup>b</sup>(*n*-Bu<sub>3</sub>SnH)<sub>actual</sub>. <sup>c</sup>(*n*-Bu<sub>3</sub>SnD)<sub>actual</sub>. <sup>d</sup>This ratio was calculated from the ion intensities of *m/z* = 78 and 79 and solution of the two simultaneous equations as detailed in the experimental section. <sup>e</sup>k<sub>H</sub> / k<sub>D</sub> = (C<sub>6</sub>H<sub>6</sub> / C<sub>6</sub>H<sub>5</sub>D) / (SnH / SnD).
